# Supplementary material
Source: PubMed Central journal article supplement (PMC5383780)
Supplement: 10.1074_M116.061440_mcp.M116.061440-16.pdf [file 10.1074_M116.061440_mcp.M116.061440-16.pdf]

**Supplement Fig. 1.** Comparison of iBAQ and FOT

**Supplement Fig. 2.** Repeatability of mass spectrometry analysis of each mouse brain regions

**Supplement Fig. 3.** Example of relative abundance comparison between iFOT and PRM result

**Supplement Fig. 4.** Example of comparison between iFOT and ISH

**Supplement Fig. 5.** Comparison of in-situ hybridization data of region-specific gene product from Allen Atlas website with current profiling data

**Supplement Fig. 6.** Proteome coverage of SNc and VTA region from wild type and Snca transgenic mouse

**Supplement Fig. 7.** Repeatability of proteome from SNc and VTA region of wild type and Snca transgenic mouse

**Supplement Fig. 8.** Age dependent and Snca transgenic dependent changes of RSOPs in SNc and VTA region

**Supplement Table 1.** Full list of Brain Region Specific Gene Products

**Supplement Table 2.** Comparison of region specific outlier protein relative abundancy between current study with Sharma's (2015) report

**Supplement Table 3.** Full list of relative abundance RSOP from shot gun profiling method and PRM analysis

**Supplement Table 4.** Full list of RSOP for relative abundance comparison between profiling and ISH

**Supplement Table 5.** Time dependent RSOP list in PD mice SNc region

**Supplement Table 6.** List and coverage of known surfaceome from 17 brain region profiling

**Supplemental Table 7-1.** Detail of recovered gene protein products from SNc of wild type and SNCA Transgenic mouse.

**Supplemental Table 7-2.** Detail of recovered gene protein products from VTA of wild type and SNCA Transgenic mouse.

**Supplemental Table 7-3.** Detail of recovered gene protein products from 6 repeat of Olfactory region

**Supplemental Table 7-4.** Detail of recovered gene protein products from 6 repeat of Striatum.

**Supplemental Table 7-5.** Detail of recovered gene protein products from 6 repeats of medial Isocortex

**Supplemental Table 7-6.** Detail of recovered gene protein products from 6 repeats of lateral Isocortex

**Supplemental Table 7-7.** Detail of recovered gene protein products from 6 repeats of medial Thalamus

**Supplemental Table 7-8.** Detail of recovered gene protein products from 6 repeats of lateral Thalamus

**Supplemental Table 7-9.** Detail of recovered gene protein products from 6 repeats of Pallidum

**Supplemental Table 7-10.** Detail of recovered gene protein products from 6 repeats of medial Hypothalamus

**Supplemental Table 7-11.** Detail of recovered gene protein products from 6 repeats of lateral Hypothalamus

**Supplemental Table 7-12.** Detail of recovered gene protein products from 6 repeats of Cortex Subplate

**Supplemental Table 7-13.** Detail of recovered gene protein products from 6 repeats of Hippocampal formation

**Supplemental Table 7-14.** Detail of recovered gene protein products from 6 repeats of Midbrain

**Supplemental Table 7-15.** Detail of recovered gene protein products from 6 repeats of Pons

**Supplemental Table 7-16.** Detail of recovered gene protein products from 6 repeats of Retro-hippocampal region

**Supplemental Table 7-17.** Detail of recovered gene protein products from 6 repeats of medial Cerebellum

**Supplemental Table 7-18.** Detail of recovered gene protein products from 6 repeats of lateral Cerebellum

**Supplemental Table 7-19.** Detail of recovered gene protein products from 6 repeats of Medulla
